# Supplementary material
Source: PubMed Central journal article supplement (PMC3891054)
Supplement: NIHMS441282-supplement.pdf [file NIHMS441282-supplement.pdf]

## **Supplemental Material**

## **Supplemental Methods**

### **Study Samples**

Participants for the current analysis were drawn from 5 cohort studies, including the Atherosclerosis Risk in Communities Study (ARIC), the Cardiovascular Health Study (CHS), the Coronary Artery Risk Development in Young Adults Study (CARDIA), the Invecchiare in Chianti Study (InCHIANTI), and the Multi-Ethnic Study of Atherosclerosis (MESA). These groups comprise the CHARGE (Cohorts for Heart and Aging Research in Genome Epidemiology) Consortium. All participants provided informed consent. Local ethical committees at each institution approved the individual study protocols.

### **Study Samples, Phenotype, and Genotyping in the Participating Cohorts**

Please see Supplemental Table 5 for summary of key methodologic features of the participating cohorts. More detailed information are outlined in the text below.

#### **The Atherosclerosis Risk in Communities Study**

The ARIC study is a multi-center prospective investigation of atherosclerotic disease in a predominantly bi-racial population<sup>1</sup>. White and African American men and women aged 45-64 years at baseline were recruited from 4 communities: Forsyth County, North Carolina; Jackson, Mississippi; suburban areas of Minneapolis, Minnesota; and Washington County, Maryland. A total of 15,792 individuals participated in the baseline examination in 1987-1989, and only baseline fasting blood from the Minnesota field center were analyzed for plasma fatty acids (n=3793).

ARIC Study samples were genotyped using the Affymetrix Genome-Wide Human SNP Array 6.0 (Santa Clara, California); for the current analysis only white participants were analyzed. Sample exclusion criteria included discordant with previous genotype data (n=83), genotypic and phenotypic sex mismatch (n=32), suspected first-degree relative of an included individual based on genotype data (n=297), genetic outlier as assessed by Identity by State (IBS) using PLINK<sup>2</sup> and >8 SD along any of the first 10 principal components in EIGENSTRAT<sup>3</sup> with 5 iterations (n=322). Autosomal SNPs were used for imputation after exclusion of SNPs with HWE deviation  $p < 1 \times 10^{-5}$ , call rate <95%, or MAF <1%.

Fatty acids were measured in EDTA plasma that had been frozen at -70°C. Fatty acid assays were performed at the Collaborative Studies Clinical Laboratory at Fairview-University

Medical Center (Minneapolis, MN) as previously described<sup>4</sup>. Lipids were extracted with chloroform/methanol and separated by thin layer chromatography. Fatty acid methyl esters were prepared from the phospholipid fraction and separated by gas chromatography using an HP-5890 gas chromatograph (Hewlett- Packard, Palo Alto, CA) with a 100-m capillary Varian CP7420 column. We identified 29 fatty acids. The concentration of each fatty acid was expressed as to percentage of total fatty acids.

### **The Cardiovascular Health Study**

The CHS is a population-based cohort study of risk factors for CHD and stroke in adults  $\geq 65$  years conducted across four field centers (Forsyth County, NC; Sacramento County, CA; Washington County, MD; Pittsburgh, PA)<sup>5</sup>. The original predominantly Caucasian cohort of 5,201 persons was recruited in 1989-1990 from random samples of the Medicare eligibility lists; subsequently, an additional predominantly African-American cohort of 687 persons were enrolled for a total sample of 5,888. DNA was extracted from blood samples drawn on all participants at their baseline examination in 1989-90. In 2007-2008, genotyping was performed at the General Clinical Research Center's Phenotyping/Genotyping Laboratory at Cedars-Sinai using the Illumina 370CNV BeadChip system on 3980 CHS participants who were free of CVD at baseline, consented to genetic testing, and had DNA available for genotyping.

A total of 1908 persons were excluded from the GWAS study sample due to the presence at study baseline of coronary heart disease, congestive heart failure, peripheral vascular disease, valvular heart disease, stroke or transient ischemic attack or lack of available DNA. Because the other cohorts were predominantly white, the African American participants were excluded from this analysis (to reduce the possibility of confounding by population structure). Participants were excluded if they had a call rate  $\leq 95\%$ . Genotyping has been attempted to date in 3,397 white participants, and was successful in 3,291 persons. Participants were eligible for the present investigation if their genotyping was complete and they had available phenotype information.

A total of 306,655 autosomal SNPs were used in imputation after filtering out SNPs with HWE deviation  $p \leq 1 \times 10^{-5}$ , call rate  $\leq 97\%$ , zero heterozygote frequency,  $>2$  duplicate errors or Mendelian inconsistencies (for reference CEPH trios), and SNPs not found in HapMap. Imputation was performed using BIMBAM v0.99 with reference to HapMap CEU using release 22, build 36.

Fatty acids were measured on samples collected in the 3<sup>rd</sup> year of follow-up. Measurements were performed at the Fred Hutchinson Cancer Research Center, providing quantitative measurement of 42 fatty acids. Blood was drawn after a 12-hour fast and stored at -70°C. Total lipids were extracted from plasma using methods of Folch, and phospholipids separated from neutral lipids by one-dimensional TLC. Fatty-acid-methyl-ester (FAME) samples were prepared by direct transesterification using methods of Lepage and separated using gas chromatography (Agilent5890 gas-chromatograph-FID-detector; Supelco fused-silica 100m capillary column SP-2560; initial 160°C 16 min, ramp 3.0°C/min to 240°C, hold 15 min). Identification, precision, and accuracy were continuously evaluated using model mixtures of known FAMEs and established in-house controls, with identification confirmed by GC-MS at USDA (Peoria, IL). CVs were <3% for most fatty acids.

### **The Coronary Artery Risk Development in Young Adults (CARDIA) Study**

The CARDIA Study is a prospective multicenter study with 5115 adults Caucasian and African American participants of the age group 18-30 years, recruited from four centers. The recruitment was done from the total community in Birmingham, AL, from selected census tracts in Chicago, IL and Minneapolis, MN; and from the Kaiser Permanente health plan membership in Oakland, CA. The details of the study design for the CARDIA study have been published before <sup>6</sup>. Eight examinations have been completed since initiation of the study in 1985–1986, respectively in the years 0, 2, 5, 7, 10, 15, 20, and 25. Written informed consent was obtained from participants at each examination and all study protocols were approved by the institutional review boards of the participating institutions.

CARDIA Study samples from were genotyped using the Affymetrix Genome-Wide Human SNP Array 6.0 (Santa Clara, California); only participants of European descent were included in the GWAS analyses. Genotyping was completed for 1720 individuals with a sample call rate  $\geq 98\%$ . A total of 578,568 SNPs passed quality control ( $MAF \geq 2\%$ , call rate  $\geq 95\%$ ,  $HWE \geq 10^{-4}$ ) and were used for imputation. For this study, complete genotype and phenotype information were available for 1507 individuals.

We also genotyped selected SNPs for participants of African descent using the TaqMan assay (Applied Biosystems, Foster City, CA) as previously described <sup>7</sup>. Primer and probes are available from the authors upon request. Polymorphism genotyping in the CARDIA study

adheres to a rigorous quality control program, which includes barcode identification of samples, robotic sample handling, and blind replicate genotype assessment on 5% of the total sample (n = 219). The overall genotyping rate with the TapMan assay was 97%, and the concordance rate for blind duplicates was greater than 99%.

Fatty acids were measured in fasted EDTA plasma collected at the year 20 examination and frozen at  $-70^{\circ}\text{C}$ , using methods previously described by Cao et al <sup>4</sup>. Lipids are extracted from the plasma using a chloroform/methanol extraction method and the cholesterol esters, triglyceride, phospholipids and free fatty acids are separated by thin layer chromatography. The fatty acid methyl esters are obtained from the phospholipids and are detected by gas chromatography flame ionization. Individual fatty acids are expressed as a percent of total fatty acids. 28 fatty acids were identified.

### **The Invecchiare in Chianti Study**

The InCHIANTI study is a population-based epidemiological study performed in a sample of the population living in the Chianti region of Tuscany, Italy. 1616 residents were selected from the population registry of Greve in Chianti and Bagno a Ripoli. The participation rate was 90% (n=1453), and the subjects age ranged between 21 and 102 years. Overnight fasted blood samples were used for genomic DNA extraction, and measurement of fatty acids. For this study, we used data from 1206 subjects with complete phenotype and genotype data.

InCHIANTI Study samples were genotyped using the Illumina 550K. Genotyping was completed for 1210 subjects with a sample call rate  $\geq 97\%$ , heterozygosity rates  $\geq 0.3$  and correct sex specification. A total of 495,343 autosomal SNPs that passed quality control (MAF  $\geq 1\%$ , completeness  $\geq 99\%$ , HWE  $\geq 10^{-4}$ ) were used for imputation.

Fatty acids were measured on aliquots of fasting plasma that had been continuously stored at  $-80^{\circ}\text{C}$  as described previously<sup>8</sup>. Fatty acid methyl esters (FAME) were prepared through transesterification using Lepage and Roy's method <sup>9</sup> with modification Rodriguez-Palmero et al <sup>10</sup>. Separation of FAME was carried out on an HP-6890 gas chromatograph (Hewlett-Packard, Palo Alto, CA) with a 30-m fused silica column (HP-225; Hewlett-Packard). FAMES were identified by comparison with pure standards (NU Chek Prep, Inc., Elysian, MA). We identified 20 fatty acids. For quantitative analysis of fatty acids as methyl esters, calibration curves for FAME (ranging from C14:0 to C24:1) were prepared by adding six increasing

amounts of individual FAME standards to the same amount of internal standard (C17:0; 50xg). The correlation coefficients for the calibration curves of fatty acids were in all cases higher than 0.998 in the range of concentrations studied. Fatty acid concentrations were expressed as a percentage of total fatty acids. The coefficient of variation for all fatty acids was on average 1.6% for intraassay and 3.3% for interassay.

### **The Multi-Ethnic Study of Atherosclerosis**

The MESA Study is a study of the characteristics of subclinical cardiovascular disease (disease detected non-invasively before it has produced clinical signs and symptoms) and the risk factors that predict progression to clinically overt cardiovascular disease or progression of the subclinical disease.<sup>11</sup> MESA researchers study a diverse, population-based sample of 6,814 asymptomatic men and women aged 45-84. Thirty-eight percent of the recruited participants are white, 28 percent African-American, 22 percent Hispanic, and 12 percent Asian, predominantly of Chinese descent, as well as 2,128 additional individuals from 594 families recruited through MESA Family by utilizing the existing MESA framework, yielding 3,026 sibpairs divided between African Americans and Hispanic-Americans. Participants were recruited from six field centers across the United States: Wake Forest University, Columbia University, Johns Hopkins University, University of Minnesota, Northwestern University and University of California - Los Angeles.

MESA and MESA Family samples were genotyped using the Affymetrix Genome-Wide Human SNP Array 6.0 (Santa Clara, California); for the current meta-analysis only self-reported Caucasian participants were analyzed, while MESA Chinese, African American and Hispanic samples are included in the look-up of top SNPs. Sample exclusion criteria included heterozygosity > 53% and individual-level genotyping call rate < 95%. Monomorphic SNPs were removed, and there was no filter on HWE or MAF. IMPUTE version 2.1.0 was used to perform imputation for the MESA SHARe Caucasian participants (chromosomes 1-22) using HapMap Phase I and II - CEU as the reference panel (release #24 - NCBI Build 36 (dbSNP b126)). Relationship inference was performed using KING<sup>7</sup> to identify first- and second- degree relatives, and an unrelated set of individuals was identified for genome-wide association analysis.

Fatty acids were obtained for a subset of 2,767 individuals with genotypes available through MESA SHARe, with approximately equal representation from the four ethnic groups (713 Caucasians, 712 Chinese, 645 African Americans, and 697 Hispanics). The fatty acids were measured in fasting EDTA plasma, frozen at  $-70^{\circ}\text{C}$ , using methods previously described by Cao et al<sup>4</sup>. Lipids are extracted from the plasma using a chloroform/methanol extraction method and the cholesterol esters, triglyceride, phospholipids and free fatty acids are separated by thin layer chromatography. The fatty acid methyl esters are obtained from the phospholipids and are detected by gas chromatography flame ionization. Individual fatty acids are expressed as a percent of total fatty acids. 28 fatty acids were identified.

### **Formula for calculating the proportion of fatty acid variance explained by SNPs**

We used a formula which is an approximation to the  $R^2$  in linear regression, i.e.

- 1) In linear regression of Y on X,  $R^2 = [\text{Corr}(Y, \hat{Y})]^2$ .
- 2) For simple linear regression,  $\hat{Y} = \alpha(\text{hat}) + \beta(\text{hat}) X$
- 3) Treating the regression coefficients as constant, this yields:

$$\begin{aligned} [\text{Corr}(Y, \hat{Y})]^2 &\approx [\text{Corr}(Y, \beta(\text{hat}) X)]^2 \\ &= \text{Cov}^2(Y, \beta(\text{hat}) X) / [\text{Var}(Y) \text{Var}(\beta(\text{hat}) X)] \\ &\approx \text{Cov}^2(Y, X) / [\text{Var}(Y) \text{Var}(X)] \end{aligned}$$

Substituting  $\beta(\text{hat}) = \text{Cov}(X, Y) / \text{Var}(X)$  and  $\text{Var}(X) = 2 * \text{MAF} * (1 - \text{MAF})$  yields

$$R^2 = [\text{Corr}(Y, \hat{Y})]^2 \approx 2 * \text{MAF} * (1 - \text{MAF}) * \beta(\text{hat})^2 / \text{Var}(Y)$$

## Supplemental Tables

### 1. Key methodologic features of the 5 cohorts

| Cohorts   | Sample size*, n | Genotyping method                             | Fatty acid measurement method |         |                                |
|-----------|-----------------|-----------------------------------------------|-------------------------------|---------|--------------------------------|
|           |                 |                                               | Sample type                   | Storage | Number of fatty acids measured |
| ARIC      | 3269            | Affymetrix Genome-Wide<br>Human SNP Array 6.0 | EDTA plasma                   | -70°C   | 29                             |
| CHS       | 2404            | Illumina 370CNV BeadChip                      | EDTA plasma                   | -70°C   | 42                             |
| CARDIA    | 1507            | Affymetrix Genome-Wide<br>Human SNP Array 6.0 | EDTA plasma                   | -70°C   | 28                             |
| InCHIANTI | 1075            | Illumina 550K                                 | Plasma                        | -80°C   | 20                             |
| MESA      | 706             | Affymetrix Genome-Wide<br>Human SNP Array 6.0 | EDTA plasma                   | -70°C   | 28                             |

\*All subjects were of White European ancestry.



## 2. Comprehensive results for palmitic acid (16:0) with $P < 5 \times 10^{-6}$

| Marker Name | Effect allele | Effect* | P-value  | Chr | Position | Nearest Gene** |
|-------------|---------------|---------|----------|-----|----------|----------------|
| rs2391388   | a             | -0.1775 | 2.72E-11 | 1   | 95258413 | <b>ALG14</b>   |
| rs6675668   | t             | 0.1785  | 7.50E-11 | 1   | 95288225 | <b>ALG14</b>   |
| rs7537374   | a             | -0.1733 | 1.05E-10 | 1   | 95258012 | <b>ALG14</b>   |
| rs7547662   | t             | 0.1724  | 1.07E-10 | 1   | 95229824 | <b>ALG14</b>   |
| rs7533303   | t             | -0.1709 | 1.45E-10 | 1   | 95235559 | <b>ALG14</b>   |
| rs11585462  | a             | -0.1764 | 1.58E-10 | 1   | 95310380 | <b>ALG14</b>   |
| rs6687388   | t             | -0.1735 | 1.60E-10 | 1   | 95287712 | <b>ALG14</b>   |
| rs4339907   | a             | -0.177  | 1.64E-10 | 1   | 95306054 | <b>ALG14</b>   |
| rs2797623   | a             | 0.171   | 1.66E-10 | 1   | 95218056 | ALG14          |
| rs10874902  | a             | 0.1781  | 1.83E-10 | 1   | 95278849 | <b>ALG14</b>   |
| rs10735790  | t             | -0.1719 | 2.25E-10 | 1   | 95276265 | <b>ALG14</b>   |
| rs4847220   | a             | -0.1675 | 2.57E-10 | 1   | 95236573 | <b>ALG14</b>   |
| rs6671200   | a             | 0.2906  | 2.70E-10 | 1   | 95470117 | RWDD3          |
| rs6678964   | a             | 0.2911  | 2.89E-10 | 1   | 95466856 | RWDD3          |
| rs259350    | c             | -0.2917 | 3.07E-10 | 1   | 95497419 | RWDD3          |
| rs259357    | t             | -0.2903 | 3.16E-10 | 1   | 95484066 | <b>RWDD3</b>   |
| rs4630159   | t             | -0.171  | 3.26E-10 | 1   | 95316266 | ALG14          |
| rs12749053  | a             | -0.2871 | 3.82E-10 | 1   | 95433144 | TMEM56         |
| rs6687450   | t             | -0.1679 | 3.84E-10 | 1   | 95253164 | <b>ALG14</b>   |
| rs9437812   | a             | 0.1693  | 3.93E-10 | 1   | 95319653 | ALG14          |
| rs6698046   | a             | -0.1648 | 4.04E-10 | 1   | 95221870 | <b>ALG14</b>   |
| rs4950058   | t             | 0.1688  | 4.15E-10 | 1   | 95320739 | ALG14          |
| rs4949965   | a             | 0.1642  | 5.53E-10 | 1   | 95323825 | ALG14          |
| rs12741128  | t             | -0.1641 | 5.73E-10 | 1   | 95340626 | TMEM56         |
| rs11591183  | t             | 0.1631  | 6.41E-10 | 1   | 95334294 | TMEM56         |
| rs933107    | t             | -0.2841 | 6.53E-10 | 1   | 95444817 | TMEM56         |
| rs12569207  | a             | -0.1629 | 6.54E-10 | 1   | 95331590 | ALG14          |
| rs11165339  | t             | 0.284   | 7.06E-10 | 1   | 95446652 | TMEM56         |
| rs4390223   | t             | 0.1617  | 8.32E-10 | 1   | 95329217 | ALG14          |
| rs2766010   | t             | 0.1599  | 1.05E-09 | 1   | 95215130 | ALG14          |
| rs12755552  | a             | -0.2824 | 1.10E-09 | 1   | 95457614 | RWDD3          |
| rs2797622   | a             | 0.1601  | 1.15E-09 | 1   | 95216790 | ALG14          |
| rs859046    | t             | -0.1754 | 1.16E-09 | 1   | 95152094 | <b>CNN3</b>    |
| rs259346    | a             | 0.291   | 1.17E-09 | 1   | 95501334 | RWDD3          |
| rs859044    | a             | -0.1799 | 1.19E-09 | 1   | 95153618 | <b>CNN3</b>    |
| rs10747468  | t             | 0.281   | 1.26E-09 | 1   | 95458879 | RWDD3          |
| rs2391391   | a             | 0.1798  | 1.31E-09 | 1   | 95224514 | <b>ALG14</b>   |
| rs13375406  | c             | 0.2911  | 1.39E-09 | 1   | 95378893 | <b>TMEM56</b>  |
| rs7540821   | a             | -0.2002 | 2.06E-09 | 1   | 95259339 | <b>ALG14</b>   |
| rs11165297  | a             | 0.2068  | 2.22E-09 | 1   | 95304762 | <b>ALG14</b>   |

|            |   |         |          |   |          |              |
|------------|---|---------|----------|---|----------|--------------|
| rs6674604  | a | 0.2002  | 2.44E-09 | 1 | 95290127 | <b>ALG14</b> |
| rs11589700 | t | 0.2604  | 2.45E-09 | 1 | 95246029 | <b>ALG14</b> |
| rs6697256  | a | 0.2253  | 2.48E-09 | 1 | 95345148 | TMEM56       |
| rs6698894  | t | -0.2036 | 2.52E-09 | 1 | 95300627 | <b>ALG14</b> |
| rs12751633 | t | -0.1992 | 2.56E-09 | 1 | 95255256 | <b>ALG14</b> |
| rs11586384 | a | 0.2751  | 2.89E-09 | 1 | 95244329 | <b>ALG14</b> |
| rs7528790  | a | 0.2341  | 3.15E-09 | 1 | 95481662 | <b>RWDD3</b> |
| rs3753872  | t | 0.2339  | 3.17E-09 | 1 | 95471772 | RWDD3        |
| rs2147587  | a | -0.2336 | 3.22E-09 | 1 | 95487472 | RWDD3        |
| rs6671842  | t | 0.1965  | 3.41E-09 | 1 | 95297091 | <b>ALG14</b> |
| rs860873   | a | -0.1668 | 3.58E-09 | 1 | 95159796 | <b>CNN3</b>  |
| rs2296308  | t | 0.2328  | 3.60E-09 | 1 | 95482527 | <b>RWDD3</b> |
| rs12760863 | a | 0.2032  | 4.30E-09 | 1 | 95306772 | <b>ALG14</b> |
| rs12751061 | a | -0.2823 | 4.93E-09 | 1 | 95303179 | <b>ALG14</b> |
| rs9437689  | t | -0.1615 | 5.07E-09 | 1 | 95322124 | ALG14        |
| rs1265169  | c | -0.1557 | 5.86E-09 | 1 | 95167123 | CNN3         |
| rs12092678 | t | -0.2094 | 6.07E-09 | 1 | 95199836 | ALG14        |
| rs6674467  | a | 0.2292  | 6.93E-09 | 1 | 95303297 | <b>ALG14</b> |
| rs6672045  | t | -0.2147 | 7.09E-09 | 1 | 95203147 | ALG14        |
| rs6684137  | a | 0.2268  | 7.25E-09 | 1 | 95311503 | ALG14        |
| rs11801110 | t | 0.2225  | 7.52E-09 | 1 | 95323242 | ALG14        |
| rs1146461  | a | 0.1534  | 7.67E-09 | 1 | 95181080 | CNN3         |
| rs859040   | t | 0.2117  | 8.00E-09 | 1 | 95157258 | <b>CNN3</b>  |
| rs11165281 | t | 0.2111  | 8.07E-09 | 1 | 95202368 | ALG14        |
| rs12739445 | c | 0.2858  | 8.57E-09 | 1 | 95245226 | <b>ALG14</b> |
| rs4387224  | t | -0.2208 | 8.78E-09 | 1 | 95319827 | ALG14        |
| rs6678809  | c | -0.2224 | 9.18E-09 | 1 | 95315804 | ALG14        |
| rs10493880 | t | -0.1517 | 9.23E-09 | 1 | 95198835 | ALG14        |
| rs3890785  | t | -0.2213 | 9.70E-09 | 1 | 95316595 | ALG14        |
| rs6680551  | a | 0.2104  | 9.96E-09 | 1 | 95340442 | TMEM56       |
| rs10465759 | t | -0.2152 | 1.00E-08 | 1 | 95263849 | <b>ALG14</b> |
| rs2298162  | t | -0.155  | 1.11E-08 | 1 | 95221621 | <b>ALG14</b> |
| rs2766005  | a | 0.15    | 1.18E-08 | 1 | 95201002 | ALG14        |
| rs864553   | c | 0.2175  | 1.35E-08 | 1 | 95151013 | <b>CNN3</b>  |
| rs12755096 | a | -0.1924 | 1.52E-08 | 1 | 95309303 | <b>ALG14</b> |
| rs2797616  | t | 0.1474  | 1.61E-08 | 1 | 95202503 | ALG14        |
| rs4131811  | t | 0.1806  | 2.28E-08 | 1 | 95272737 | <b>ALG14</b> |
| rs4615892  | t | 0.1965  | 2.36E-08 | 1 | 95319811 | ALG14        |
| rs11590106 | a | -0.1803 | 2.55E-08 | 1 | 95278423 | <b>ALG14</b> |
| rs7417186  | t | 0.1956  | 2.58E-08 | 1 | 95319018 | ALG14        |
| rs1265168  | t | -0.2051 | 2.91E-08 | 1 | 95167419 | CNN3         |
| rs2040048  | a | -0.1496 | 3.33E-08 | 1 | 95185002 | CNN3         |
| rs11590093 | a | 0.227   | 4.98E-08 | 1 | 95194032 | ALG14        |
| rs11165305 | a | 0.1522  | 7.36E-08 | 1 | 95344172 | TMEM56       |

|            |   |         |          |    |           |               |
|------------|---|---------|----------|----|-----------|---------------|
| rs6687351  | a | 0.1999  | 8.40E-08 | 1  | 95312293  | ALG14         |
| rs6662345  | t | 0.1991  | 9.27E-08 | 1  | 95311664  | ALG14         |
| rs6679106  | a | -0.1993 | 9.43E-08 | 1  | 95312366  | ALG14         |
| rs12239887 | a | 0.1858  | 1.14E-07 | 1  | 95313071  | ALG14         |
| rs4619020  | t | 0.1472  | 1.35E-07 | 1  | 95344382  | TMEM56        |
| rs7543042  | t | -0.2541 | 1.50E-07 | 1  | 95452270  | RWDD3         |
| rs12562716 | a | -0.1462 | 1.59E-07 | 1  | 95343288  | TMEM56        |
| rs6672436  | t | 0.1455  | 1.59E-07 | 1  | 95341850  | TMEM56        |
| rs4128898  | c | 0.1465  | 1.60E-07 | 1  | 95346487  | TMEM56        |
| rs1132     | a | 0.1433  | 1.62E-07 | 1  | 95166940  | CNN3          |
| rs603424   | a | 0.1891  | 1.64E-07 | 10 | 102065469 | <b>PKD2L1</b> |
| rs1146460  | t | 0.1363  | 1.85E-07 | 1  | 95181508  | CNN3          |
| rs994988   | t | -0.1395 | 2.10E-07 | 6  | 103905739 | GRIK2         |
| rs6665763  | t | 0.1413  | 2.24E-07 | 1  | 95339924  | TMEM56        |
| rs11807661 | a | -0.1972 | 2.43E-07 | 1  | 95173787  | CNN3          |
| rs1271952  | t | -0.1342 | 2.75E-07 | 1  | 95189936  | CNN3          |
| rs6667676  | a | 0.1468  | 3.81E-07 | 1  | 95193903  | ALG14         |
| rs6666037  | t | -0.3021 | 4.44E-07 | 1  | 95757953  | RWDD3         |
| rs9322714  | a | 0.1305  | 8.81E-07 | 6  | 103891492 | GRIK2         |
| rs767015   | t | 0.1325  | 8.90E-07 | 1  | 95169520  | CNN3          |
| rs10414689 | t | 0.7818  | 9.03E-07 | 19 | 56488111  | FLJ40235      |
| rs10809457 | t | -0.1394 | 9.30E-07 | 9  | 11392319  | PTPRD         |
| rs6474646  | t | 0.1332  | 1.07E-06 | 9  | 11391208  | PTPRD         |
| rs9499395  | a | 0.1313  | 1.21E-06 | 6  | 103894965 | GRIK2         |
| rs1246351  | a | 0.1303  | 1.25E-06 | 1  | 95189329  | CNN3          |
| rs4950077  | a | 0.132   | 1.43E-06 | 1  | 95351672  | TMEM56        |
| rs10237735 | t | -0.7138 | 1.46E-06 | 7  | 32343273  | LSM5          |
| rs1023330  | t | -0.1308 | 1.79E-06 | 1  | 95359361  | <b>TMEM56</b> |
| rs2157552  | a | -0.1312 | 1.79E-06 | 6  | 103885057 | GRIK2         |
| rs16927656 | t | -0.1348 | 2.38E-06 | 9  | 11482959  | PTPRD         |
| rs780093   | t | 0.1261  | 2.65E-06 | 2  | 27596107  | <b>GCKR</b>   |
| rs7561966  | a | -0.6809 | 3.19E-06 | 2  | 129220821 | HS6ST1        |
| rs1596341  | a | -0.127  | 3.32E-06 | 9  | 11489438  | PTPRD         |
| rs1260333  | a | 0.1252  | 3.44E-06 | 2  | 27602128  | GCKR          |
| rs2911711  | a | -0.1252 | 3.51E-06 | 2  | 27604050  | GCKR          |
| rs1887094  | c | -0.1244 | 4.11E-06 | 1  | 95191290  | CNN3          |
| rs4946988  | a | -0.1242 | 4.17E-06 | 6  | 103893921 | GRIK2         |
| rs10234749 | t | -0.1788 | 4.21E-06 | 7  | 152018802 | XRCC2         |
| rs9390987  | a | 0.124   | 4.27E-06 | 6  | 103891327 | GRIK2         |
| rs1980946  | c | -0.298  | 4.44E-06 | 20 | 47777718  | B4GALT5       |
| rs9816269  | t | 0.3667  | 4.64E-06 | 3  | 21693845  | <b>ZNF659</b> |
| rs6474664  | a | 0.1249  | 4.66E-06 | 9  | 11547454  | PTPRD         |
| rs780094   | t | 0.1227  | 4.67E-06 | 2  | 27594741  | <b>GCKR</b>   |
| rs12297524 | t | 0.1258  | 4.82E-06 | 12 | 127302475 | SLC15A4       |

|            |   |        |          |    |           |               |
|------------|---|--------|----------|----|-----------|---------------|
| rs17009275 | t | 0.3669 | 4.82E-06 | 3  | 21694893  | <b>ZNF659</b> |
| rs11609257 | t | 0.1251 | 4.87E-06 | 12 | 127303699 | SLC15A4       |

### 3. Comprehensive results for palmitoleic acid (16:1n-7) with $P < 5 \times 10^{-6}$

| Marker Name | Effect allele | Effect* | P-value  | Chr | Position  | Nearest Gene** |
|-------------|---------------|---------|----------|-----|-----------|----------------|
| rs603424    | a             | -0.0326 | 5.69E-15 | 10  | 102065469 | <b>PKD2L1</b>  |
| rs102275    | t             | -0.0238 | 6.60E-13 | 11  | 61314379  | <b>C11orf0</b> |
| rs174536    | a             | -0.0233 | 1.91E-12 | 11  | 61308503  | <b>C11orf9</b> |
| rs174535    | t             | -0.0233 | 1.97E-12 | 11  | 61307932  | <b>C11orf9</b> |
| rs174545    | c             | -0.0231 | 2.29E-12 | 11  | 61325882  | <b>FADS1</b>   |
| rs174546    | t             | 0.0231  | 2.36E-12 | 11  | 61326406  | <b>FADS1</b>   |
| rs174537    | t             | 0.0232  | 2.38E-12 | 11  | 61309256  | <b>C11orf9</b> |
| rs174577    | a             | 0.0235  | 2.62E-12 | 11  | 61361390  | <b>FADS2</b>   |
| rs174574    | a             | 0.0233  | 2.73E-12 | 11  | 61356918  | <b>FADS2</b>   |
| rs174550    | t             | -0.023  | 2.76E-12 | 11  | 61328054  | <b>FADS1</b>   |
| rs174547    | t             | -0.023  | 2.97E-12 | 11  | 61327359  | <b>FADS1</b>   |
| rs174576    | a             | 0.0232  | 4.84E-12 | 11  | 61360086  | <b>FADS2</b>   |
| rs1535      | a             | -0.0227 | 5.80E-12 | 11  | 61354548  | <b>FADS2</b>   |
| rs174548    | c             | -0.024  | 6.64E-12 | 11  | 61327924  | <b>FADS1</b>   |
| rs174578    | a             | 0.0231  | 6.83E-12 | 11  | 61362075  | <b>FADS2</b>   |
| rs174549    | a             | 0.0235  | 2.31E-11 | 11  | 61327958  | <b>FADS1</b>   |
| rs174555    | t             | -0.0234 | 2.45E-11 | 11  | 61336336  | <b>FADS1</b>   |
| rs174556    | t             | 0.0231  | 3.38E-11 | 11  | 61337211  | <b>FADS1</b>   |
| rs174541    | t             | -0.0221 | 4.11E-11 | 11  | 61322484  | FADS1          |
| rs174583    | t             | 0.0219  | 7.14E-11 | 11  | 61366326  | <b>FADS2</b>   |
| rs4246215   | t             | 0.0218  | 7.80E-11 | 11  | 61320875  | <b>FEN1</b>    |
| rs174528    | t             | -0.0209 | 4.30E-10 | 11  | 61300075  | <b>C11orf9</b> |
| rs174601    | t             | 0.0222  | 6.68E-10 | 11  | 61379716  | <b>FADS2</b>   |
| rs174538    | a             | 0.021   | 8.23E-10 | 11  | 61316657  | <b>C11orf0</b> |
| rs780093    | t             | 0.0201  | 9.80E-10 | 2   | 27596107  | <b>GCKR</b>    |
| rs780094    | t             | 0.0199  | 1.26E-09 | 2   | 27594741  | <b>GCKR</b>    |
| rs1260326   | t             | 0.0195  | 3.75E-09 | 2   | 27584444  | <b>GCKR</b>    |
| rs11190604  | a             | -0.0236 | 5.69E-09 | 10  | 102292447 | <b>HIF1AN</b>  |
| rs3763695   | a             | -0.0228 | 5.90E-09 | 10  | 102259196 | <b>SEC31B</b>  |
| rs7071271   | a             | 0.0229  | 5.93E-09 | 10  | 102254814 | <b>SEC31B</b>  |
| rs2495759   | a             | 0.0236  | 5.95E-09 | 10  | 102310353 | HIF1AN         |
| rs2295772   | a             | 0.0228  | 6.05E-09 | 10  | 102255173 | <b>SEC31B</b>  |
| rs7080356   | a             | -0.0228 | 6.06E-09 | 10  | 102256725 | <b>SEC31B</b>  |
| rs2295773   | a             | -0.0228 | 6.12E-09 | 10  | 102255805 | <b>SEC31B</b>  |
| rs3750630   | a             | -0.023  | 6.14E-09 | 10  | 102265770 | <b>SEC31B</b>  |
| rs11190589  | a             | -0.023  | 6.15E-09 | 10  | 102265461 | <b>SEC31B</b>  |
| rs4244338   | a             | -0.0229 | 6.15E-09 | 10  | 102262792 | <b>SEC31B</b>  |

|            |   |         |          |    |           |               |
|------------|---|---------|----------|----|-----------|---------------|
| rs10509744 | t | 0.0228  | 6.15E-09 | 10 | 102261569 | <b>SEC31B</b> |
| rs3750631  | a | -0.0229 | 6.25E-09 | 10 | 102269284 | <b>SEC31B</b> |
| rs12358187 | c | -0.0229 | 6.33E-09 | 10 | 102274439 | <b>NDUFB8</b> |
| rs4919468  | c | 0.0229  | 6.40E-09 | 10 | 102278333 | <b>NDUFB8</b> |
| rs1800662  | a | 0.0229  | 6.50E-09 | 10 | 102279068 | <b>NDUFB8</b> |
| rs10883506 | c | -0.0229 | 6.58E-09 | 10 | 102279733 | <b>NDUFB8</b> |
| rs2489037  | t | 0.023   | 6.60E-09 | 10 | 102309908 | <b>HIF1AN</b> |
| rs3750629  | t | -0.0229 | 6.81E-09 | 10 | 102265717 | <b>SEC31B</b> |
| rs3750627  | a | 0.0229  | 6.92E-09 | 10 | 102265632 | <b>SEC31B</b> |
| rs7477246  | t | 0.0227  | 6.95E-09 | 10 | 102251528 | <b>SEC31B</b> |
| rs7099965  | a | -0.0234 | 6.96E-09 | 10 | 102291155 | <b>HIF1AN</b> |
| rs2273695  | a | -0.0227 | 7.07E-09 | 10 | 102249558 | <b>SEC31B</b> |
| rs2489034  | t | 0.023   | 7.21E-09 | 10 | 102309182 | <b>HIF1AN</b> |
| rs2495751  | a | -0.023  | 7.22E-09 | 10 | 102317250 | <b>HIF1AN</b> |
| rs4604805  | c | 0.0226  | 7.43E-09 | 10 | 102251399 | <b>SEC31B</b> |
| rs10883507 | t | 0.0229  | 7.47E-09 | 10 | 102281265 | <b>NDUFB8</b> |
| rs12219158 | t | -0.0234 | 7.58E-09 | 10 | 102292913 | <b>HIF1AN</b> |
| rs3793706  | a | 0.0226  | 7.65E-09 | 10 | 102259075 | <b>SEC31B</b> |
| rs7088827  | c | -0.0234 | 7.70E-09 | 10 | 102293855 | <b>HIF1AN</b> |
| rs11816840 | c | 0.023   | 7.89E-09 | 10 | 102299210 | <b>HIF1AN</b> |
| rs10786597 | t | 0.0228  | 8.00E-09 | 10 | 102281277 | <b>NDUFB8</b> |
| rs2295780  | a | -0.0231 | 8.08E-09 | 10 | 102295955 | <b>HIF1AN</b> |
| rs7091356  | c | 0.0228  | 8.16E-09 | 10 | 102282258 | <b>NDUFB8</b> |
| rs12354411 | a | 0.0228  | 8.26E-09 | 10 | 102284527 | <b>HIF1AN</b> |
| rs2495744  | t | 0.0229  | 8.27E-09 | 10 | 102319399 | <b>HIF1AN</b> |
| rs10883512 | a | -0.023  | 8.29E-09 | 10 | 102298506 | <b>HIF1AN</b> |
| rs11190613 | t | -0.0229 | 8.36E-09 | 10 | 102303987 | <b>HIF1AN</b> |
| rs11292    | a | -0.0229 | 8.71E-09 | 10 | 102303597 | <b>HIF1AN</b> |
| rs10883510 | t | 0.023   | 8.94E-09 | 10 | 102287008 | <b>HIF1AN</b> |
| rs7073586  | a | -0.0229 | 9.07E-09 | 10 | 102297661 | <b>HIF1AN</b> |
| rs10883509 | t | 0.0227  | 9.07E-09 | 10 | 102286451 | <b>HIF1AN</b> |
| rs2495750  | a | -0.0228 | 9.11E-09 | 10 | 102317698 | <b>HIF1AN</b> |
| rs7084810  | a | -0.0231 | 9.27E-09 | 10 | 102287536 | <b>HIF1AN</b> |
| rs2489039  | a | 0.0228  | 9.29E-09 | 10 | 102318026 | <b>HIF1AN</b> |
| rs11190602 | t | -0.023  | 9.30E-09 | 10 | 102287246 | <b>HIF1AN</b> |
| rs4919471  | a | -0.0231 | 9.41E-09 | 10 | 102289229 | <b>HIF1AN</b> |
| rs2489040  | a | 0.0228  | 9.46E-09 | 10 | 102321288 | <b>HIF1AN</b> |
| rs2495741  | a | -0.0228 | 9.62E-09 | 10 | 102321785 | <b>HIF1AN</b> |
| rs2489043  | t | -0.0227 | 9.63E-09 | 10 | 102324317 | <b>HIF1AN</b> |
| rs2495747  | t | 0.0228  | 9.76E-09 | 10 | 102318237 | <b>HIF1AN</b> |
| rs9420797  | t | 0.0228  | 1.01E-08 | 10 | 102321137 | <b>HIF1AN</b> |
| rs2273694  | t | 0.0225  | 1.01E-08 | 10 | 102246486 | <b>SEC31B</b> |
| rs4919472  | a | 0.0241  | 1.01E-08 | 10 | 102305854 | <b>HIF1AN</b> |
| rs2495735  | a | 0.0227  | 1.02E-08 | 10 | 102328599 | <b>HIF1AN</b> |

|            |   |         |          |    |           |               |
|------------|---|---------|----------|----|-----------|---------------|
| rs2495734  | a | 0.0227  | 1.04E-08 | 10 | 102328676 | HIF1AN        |
| rs2489045  | t | 0.0227  | 1.06E-08 | 10 | 102334744 | HIF1AN        |
| rs2495745  | t | -0.0227 | 1.12E-08 | 10 | 102319065 | HIF1AN        |
| rs2295779  | a | -0.0226 | 1.13E-08 | 10 | 102286051 | <b>HIF1AN</b> |
| rs2489046  | a | -0.0225 | 1.27E-08 | 10 | 102336272 | HIF1AN        |
| rs3750720  | t | 0.0224  | 1.58E-08 | 10 | 102238874 | <b>SEC31B</b> |
| rs2489053  | t | -0.0224 | 1.66E-08 | 10 | 102343331 | HIF1AN        |
| rs2295774  | a | -0.0222 | 1.90E-08 | 10 | 102255837 | <b>SEC31B</b> |
| rs10883511 | a | -0.0241 | 2.12E-08 | 10 | 102289397 | <b>HIF1AN</b> |
| rs3750719  | c | -0.0216 | 2.52E-08 | 10 | 102238940 | <b>SEC31B</b> |
| rs2911711  | a | -0.0183 | 3.07E-08 | 2  | 27604050  | GCKR          |
| rs1260333  | a | 0.0183  | 3.19E-08 | 2  | 27602128  | GCKR          |
| rs2295770  | a | 0.0214  | 3.31E-08 | 10 | 102229819 | <b>WNT8B</b>  |
| rs11190578 | t | 0.0214  | 3.35E-08 | 10 | 102228943 | <b>WNT8B</b>  |
| rs12355721 | t | 0.0214  | 3.38E-08 | 10 | 102234901 | SEC31B        |
| rs2298075  | a | 0.0214  | 3.52E-08 | 10 | 102237398 | <b>SEC31B</b> |
| rs6722456  | a | -0.0478 | 4.12E-08 | 2  | 134245561 | NAP5          |
| rs3886664  | t | 0.0472  | 4.15E-08 | 2  | 134235838 | NAP5          |
| rs11190573 | t | -0.0211 | 4.86E-08 | 10 | 102223162 | <b>WNT8B</b>  |
| rs2489003  | a | -0.0261 | 4.97E-08 | 10 | 102350845 | HIF1AN        |
| rs11190568 | t | 0.0211  | 5.02E-08 | 10 | 102214267 | <b>WNT8B</b>  |
| rs7900678  | t | -0.0211 | 5.43E-08 | 10 | 102219006 | <b>WNT8B</b>  |
| rs10883497 | t | -0.0211 | 5.44E-08 | 10 | 102218509 | <b>WNT8B</b>  |
| rs3793772  | t | -0.021  | 5.52E-08 | 10 | 102212815 | <b>WNT8B</b>  |
| rs11190569 | a | 0.021   | 5.56E-08 | 10 | 102217399 | <b>WNT8B</b>  |
| rs12219789 | a | -0.021  | 5.62E-08 | 10 | 102203768 | WNT8B         |
| rs3793771  | c | 0.021   | 5.75E-08 | 10 | 102212947 | <b>WNT8B</b>  |
| rs11190552 | a | 0.021   | 5.89E-08 | 10 | 102196597 | WNT8B         |
| rs1539089  | a | -0.0209 | 5.91E-08 | 10 | 102211414 | WNT8B         |
| rs7085439  | t | 0.0209  | 6.33E-08 | 10 | 102200090 | WNT8B         |
| rs1417823  | a | -0.0209 | 6.35E-08 | 10 | 102217876 | <b>WNT8B</b>  |
| rs7085261  | a | 0.0209  | 6.64E-08 | 10 | 102199801 | WNT8B         |
| rs6749899  | c | 0.0485  | 6.68E-08 | 2  | 134249903 | NAP5          |
| rs7559706  | a | 0.0486  | 6.92E-08 | 2  | 134250532 | NAP5          |
| rs10883493 | a | -0.0209 | 6.93E-08 | 10 | 102198178 | WNT8B         |
| rs11190541 | a | -0.0208 | 7.18E-08 | 10 | 102193061 | WNT8B         |
| rs10883492 | a | 0.0209  | 7.19E-08 | 10 | 102196079 | WNT8B         |
| rs4665987  | a | 0.02    | 7.98E-08 | 2  | 27609329  | GCKR          |
| rs11190540 | t | -0.0207 | 8.83E-08 | 10 | 102192619 | WNT8B         |
| rs3829160  | a | 0.0174  | 1.02E-07 | 10 | 102104997 | <b>SCD</b>    |
| rs12615694 | t | -0.0472 | 1.06E-07 | 2  | 134228832 | NAP5          |
| rs4665991  | a | 0.0192  | 1.17E-07 | 2  | 27619788  | GCKR          |
| rs10509742 | a | 0.0513  | 1.20E-07 | 10 | 102080914 | PKD2L1        |
| rs4665382  | t | -0.0191 | 1.37E-07 | 2  | 27637305  | C2orf16       |

|            |   |         |          |    |           |                |
|------------|---|---------|----------|----|-----------|----------------|
| rs10208529 | a | -0.0191 | 1.40E-07 | 2  | 27639692  | C2orf16        |
| rs2489041  | c | 0.0229  | 1.60E-07 | 10 | 102323625 | HIF1AN         |
| rs4665383  | c | -0.019  | 1.70E-07 | 2  | 27645059  | C2orf16        |
| rs108499   | t | 0.0178  | 2.19E-07 | 11 | 61303813  | <b>C11orf9</b> |
| rs174534   | a | -0.0177 | 2.21E-07 | 11 | 61306034  | <b>C11orf9</b> |
| rs1919128  | a | -0.0187 | 2.27E-07 | 2  | 27655263  | <b>C2orf16</b> |
| rs12478841 | a | -0.0187 | 2.34E-07 | 2  | 27665226  | <b>ZNF512</b>  |
| rs6760250  | a | 0.0187  | 2.39E-07 | 2  | 27665756  | <b>ZNF512</b>  |
| rs13022873 | a | -0.0186 | 2.45E-07 | 2  | 27669014  | <b>ZNF512</b>  |
| rs12360395 | a | -0.0201 | 2.50E-07 | 10 | 102184064 | WNT8B          |
| rs12467476 | t | -0.0186 | 2.57E-07 | 2  | 27679219  | <b>ZNF512</b>  |
| rs4919458  | a | -0.02   | 2.59E-07 | 10 | 102167718 | WNT8B          |
| rs10883483 | t | -0.02   | 2.72E-07 | 10 | 102164234 | WNT8B          |
| rs10509743 | t | 0.02    | 2.77E-07 | 10 | 102180396 | WNT8B          |
| rs1919127  | t | -0.0185 | 2.82E-07 | 2  | 27654997  | <b>C2orf16</b> |
| rs3750723  | t | -0.0199 | 2.95E-07 | 10 | 102162979 | SCD            |
| rs2384656  | a | -0.0186 | 2.98E-07 | 2  | 27685559  | <b>ZNF512</b>  |
| rs2366017  | a | -0.0938 | 3.09E-07 | 17 | 65362496  | KCNJ16         |
| rs3829162  | t | -0.0199 | 3.14E-07 | 10 | 102162742 | SCD            |
| rs11190513 | a | -0.0199 | 3.16E-07 | 10 | 102155228 | SCD            |
| rs10786590 | t | -0.0198 | 3.23E-07 | 10 | 102154594 | SCD            |
| rs2489001  | a | -0.0223 | 3.26E-07 | 10 | 102348387 | HIF1AN         |
| rs10883479 | a | -0.0198 | 3.31E-07 | 10 | 102152850 | SCD            |
| rs10883477 | a | -0.0198 | 3.40E-07 | 10 | 102151386 | SCD            |
| rs10883478 | t | 0.0198  | 3.41E-07 | 10 | 102152842 | SCD            |
| rs17732523 | t | 0.0198  | 3.51E-07 | 10 | 102151091 | SCD            |
| rs4465599  | a | 0.0276  | 3.55E-07 | 16 | 13062379  | FLJ1111        |
| rs4666002  | c | 0.0185  | 3.56E-07 | 2  | 27694144  | <b>ZNF512</b>  |
| rs872290   | a | 0.0198  | 3.60E-07 | 10 | 102188869 | WNT8B          |
| rs2118674  | a | -0.0498 | 4.34E-07 | 2  | 171027140 | <b>MYO3B</b>   |
| rs522951   | c | -0.0158 | 5.39E-07 | 10 | 102100891 | <b>SCD</b>     |
| rs13002853 | c | -0.0185 | 8.22E-07 | 2  | 27706749  | <b>XAB1</b>    |
| rs174575   | c | -0.0179 | 1.41E-06 | 11 | 61358579  | <b>FADS2</b>   |
| rs1931575  | t | 0.0178  | 1.56E-06 | 1  | 94305602  | <b>ABCA4</b>   |
| rs3749147  | a | 0.0186  | 1.70E-06 | 2  | 27705422  | <b>XAB1</b>    |
| rs788076   | a | 0.0439  | 1.83E-06 | 10 | 29376855  | LYZL1          |
| rs509360   | a | -0.019  | 1.93E-06 | 11 | 61305135  | C11orf9        |
| rs12587252 | t | -0.0785 | 2.17E-06 | 14 | 80475675  | C14orf45       |
| rs2151849  | a | 0.0186  | 2.43E-06 | 1  | 94307762  | <b>ABCA4</b>   |
| rs12599426 | t | 0.0243  | 2.50E-06 | 16 | 34945632  | LOC72935       |
| rs3789412  | t | -0.0185 | 2.72E-06 | 1  | 94308655  | 5              |
| rs4666000  | t | -0.0166 | 2.79E-06 | 2  | 27692873  | <b>ABCA4</b>   |
| rs7534537  | t | 0.0587  | 2.85E-06 | 1  | 202541142 | <b>ZNF512</b>  |
| rs2323397  | a | 0.0357  | 2.91E-06 | 13 | 36660637  | <b>PLEKHA</b>  |

|            |   |         |          |    |           |                |
|------------|---|---------|----------|----|-----------|----------------|
| rs670213   | t | 0.0152  | 3.30E-06 | 10 | 102096357 | <b>6</b>       |
| rs2727270  | t | 0.0235  | 3.39E-06 | 11 | 61359813  | <b>CSNK1A1</b> |
| rs2068834  | t | -0.0164 | 3.50E-06 | 2  | 27693043  | <b>L</b>       |
| rs2727271  | a | -0.0234 | 3.63E-06 | 11 | 61359934  | <b>SCD</b>     |
| rs7084075  | t | -0.0145 | 4.44E-06 | 10 | 102050369 | <b>FADS2</b>   |
| rs7597155  | a | 0.0149  | 4.58E-06 | 2  | 69838939  | <b>ZNF512</b>  |
| rs17054925 | a | 0.05    | 4.74E-06 | 13 | 36586781  | <b>FADS2</b>   |
| rs1199997  | t | -0.0499 | 4.75E-06 | 13 | 36603125  | <b>PKD2L1</b>  |
| rs2524299  | a | -0.0227 | 4.91E-06 | 11 | 61361358  | <b>ANXA4</b>   |
| rs4852988  | t | -0.0147 | 4.99E-06 | 2  | 69831794  | <b>CSNK1A1</b> |
|            |   |         |          |    |           | <b>L</b>       |
|            |   |         |          |    |           | <b>CSNK1A1</b> |
|            |   |         |          |    |           | <b>L</b>       |
|            |   |         |          |    |           | <b>FADS2</b>   |
|            |   |         |          |    |           | <b>ANXA4</b>   |

#### 4. Comprehensive results for stearic acid (18:0) with $P < 5 \times 10^{-6}$

| Marker Name | Effect allele | Effect* | P-value  | Chr | Position | Nearest Gene**  |
|-------------|---------------|---------|----------|-----|----------|-----------------|
| rs102275    | t             | 0.1798  | 1.33E-20 | 11  | 61314379 | <b>C11orf10</b> |
| rs174537    | t             | -0.1788 | 2.17E-20 | 11  | 61309256 | <b>C11orf9</b>  |
| rs174536    | a             | 0.1776  | 4.32E-20 | 11  | 61308503 | <b>C11orf9</b>  |
| rs174535    | t             | 0.1777  | 4.33E-20 | 11  | 61307932 | <b>C11orf9</b>  |
| rs174547    | t             | 0.1773  | 4.42E-20 | 11  | 61327359 | <b>FADS1</b>    |
| rs174545    | c             | 0.1771  | 4.75E-20 | 11  | 61325882 | <b>FADS1</b>    |
| rs174546    | t             | -0.1765 | 5.49E-20 | 11  | 61326406 | <b>FADS1</b>    |
| rs174550    | t             | 0.1755  | 1.07E-19 | 11  | 61328054 | <b>FADS1</b>    |
| rs174574    | a             | -0.1733 | 3.69E-19 | 11  | 61356918 | <b>FADS2</b>    |
| rs1535      | a             | 0.1719  | 5.04E-19 | 11  | 61354548 | <b>FADS2</b>    |
| rs174549    | a             | -0.1757 | 6.57E-19 | 11  | 61327958 | <b>FADS1</b>    |
| rs174576    | a             | -0.1735 | 7.82E-19 | 11  | 61360086 | <b>FADS2</b>    |
| rs174577    | a             | -0.1732 | 7.99E-19 | 11  | 61361390 | <b>FADS2</b>    |
| rs174583    | t             | -0.1734 | 9.91E-19 | 11  | 61366326 | <b>FADS2</b>    |
| rs174578    | a             | -0.1731 | 1.17E-18 | 11  | 61362075 | <b>FADS2</b>    |
| rs174541    | t             | 0.1711  | 1.19E-18 | 11  | 61322484 | <b>FADS1</b>    |
| rs174548    | c             | 0.1731  | 1.61E-18 | 11  | 61327924 | <b>FADS1</b>    |
| rs6675668   | t             | -0.1651 | 2.16E-18 | 1   | 95288225 | <b>ALG14</b>    |
| rs4246215   | t             | -0.1697 | 2.24E-18 | 11  | 61320875 | <b>FEN1</b>     |
| rs174555    | t             | 0.1722  | 2.36E-18 | 11  | 61336336 | <b>FADS1</b>    |
| rs6687388   | t             | 0.1671  | 2.88E-18 | 1   | 95287712 | <b>ALG14</b>    |
| rs174556    | t             | -0.1695 | 4.19E-18 | 11  | 61337211 | <b>FADS1</b>    |
| rs10874902  | a             | -0.1704 | 4.60E-18 | 1   | 95278849 | <b>ALG14</b>    |
| rs2391388   | a             | 0.1592  | 6.80E-18 | 1   | 95258413 | <b>ALG14</b>    |



|            |   |         |          |    |          |                 |
|------------|---|---------|----------|----|----------|-----------------|
| rs10735790 | t | 0.1646  | 7.24E-18 | 1  | 95276265 | <b>ALG14</b>    |
| rs11585462 | a | 0.1673  | 8.61E-18 | 1  | 95310380 | <b>ALG14</b>    |
| rs4339907  | a | 0.1675  | 1.17E-17 | 1  | 95306054 | <b>ALG14</b>    |
| rs7537374  | a | 0.1578  | 1.37E-17 | 1  | 95258012 | <b>ALG14</b>    |
| rs174601   | t | -0.1832 | 2.06E-17 | 11 | 61379716 | <b>FADS2</b>    |
| rs11591183 | t | -0.1574 | 2.18E-17 | 1  | 95334294 | TMEM56          |
| rs12741128 | t | 0.1581  | 2.56E-17 | 1  | 95340626 | TMEM56          |
| rs12569207 | a | 0.1568  | 2.64E-17 | 1  | 95331590 | ALG14           |
| rs4630159  | t | 0.1621  | 2.81E-17 | 1  | 95316266 | ALG14           |
| rs4949965  | a | -0.1572 | 3.07E-17 | 1  | 95323825 | ALG14           |
| rs6687450  | t | 0.16    | 3.10E-17 | 1  | 95253164 | <b>ALG14</b>    |
| rs4390223  | t | -0.1561 | 3.33E-17 | 1  | 95329217 | ALG14           |
| rs9437812  | a | -0.1605 | 3.86E-17 | 1  | 95319653 | ALG14           |
| rs4950058  | t | -0.1601 | 4.15E-17 | 1  | 95320739 | ALG14           |
| rs2797623  | a | -0.1542 | 5.53E-17 | 1  | 95218056 | ALG14           |
| rs7547662  | t | -0.1534 | 7.12E-17 | 1  | 95229824 | <b>ALG14</b>    |
| rs7533303  | t | 0.1523  | 7.98E-17 | 1  | 95235559 | <b>ALG14</b>    |
| rs4847220  | a | 0.1558  | 8.00E-17 | 1  | 95236573 | <b>ALG14</b>    |
| rs6698046  | a | 0.1533  | 1.61E-16 | 1  | 95221870 | <b>ALG14</b>    |
| rs174528   | t | 0.1601  | 2.38E-16 | 11 | 61300075 | <b>C11orf9</b>  |
| rs2797622  | a | -0.1518 | 2.54E-16 | 1  | 95216790 | ALG14           |
| rs2766010  | t | -0.1508 | 3.02E-16 | 1  | 95215130 | ALG14           |
| rs174538   | a | -0.1669 | 4.87E-16 | 11 | 61316657 | <b>C11orf10</b> |
| rs6671200  | a | -0.2461 | 1.76E-15 | 1  | 95470117 | RWDD3           |
| rs10493880 | t | 0.1482  | 1.81E-15 | 1  | 95198835 | ALG14           |
| rs6678964  | a | -0.2441 | 2.69E-15 | 1  | 95466856 | RWDD3           |
| rs259357   | t | 0.2456  | 2.79E-15 | 1  | 95484066 | <b>RWDD3</b>    |
| rs259350   | c | 0.2456  | 3.15E-15 | 1  | 95497419 | RWDD3           |
| rs9437689  | t | 0.1529  | 3.92E-15 | 1  | 95322124 | ALG14           |
| rs259346   | a | -0.2533 | 4.68E-15 | 1  | 95501334 | RWDD3           |
| rs12755552 | a | 0.2401  | 8.12E-15 | 1  | 95457614 | RWDD3           |
| rs10747468 | t | -0.2389 | 1.07E-14 | 1  | 95458879 | RWDD3           |
| rs933107   | t | 0.2364  | 1.32E-14 | 1  | 95444817 | TMEM56          |
| rs12749053 | a | 0.2361  | 1.33E-14 | 1  | 95433144 | TMEM56          |
| rs11165339 | t | -0.2368 | 1.38E-14 | 1  | 95446652 | TMEM56          |
| rs860873   | a | 0.1472  | 2.19E-14 | 1  | 95159796 | <b>CNN3</b>     |
| rs2766005  | a | -0.1381 | 2.45E-14 | 1  | 95201002 | ALG14           |
| rs2391391  | a | -0.1516 | 1.26E-13 | 1  | 95224514 | <b>ALG14</b>    |
| rs1146461  | a | -0.1372 | 2.98E-13 | 1  | 95181080 | CNN3            |
| rs2298162  | t | 0.1358  | 3.14E-13 | 1  | 95221621 | <b>ALG14</b>    |
| rs1265169  | c | 0.1382  | 3.52E-13 | 1  | 95167123 | CNN3            |
| rs2797616  | t | -0.131  | 9.96E-13 | 1  | 95202503 | ALG14           |
| rs6674604  | a | -0.1646 | 1.19E-12 | 1  | 95290127 | <b>ALG14</b>    |
| rs6671842  | t | -0.1638 | 1.21E-12 | 1  | 95297091 | <b>ALG14</b>    |

|            |   |         |          |    |          |                |
|------------|---|---------|----------|----|----------|----------------|
| rs174534   | a | 0.1444  | 1.26E-12 | 11 | 61306034 | <b>C11orf9</b> |
| rs12760863 | a | -0.17   | 1.29E-12 | 1  | 95306772 | <b>ALG14</b>   |
| rs108499   | t | -0.1453 | 1.29E-12 | 11 | 61303813 | <b>C11orf9</b> |
| rs11165297 | a | -0.1694 | 1.57E-12 | 1  | 95304762 | <b>ALG14</b>   |
| rs6698894  | t | 0.1665  | 1.68E-12 | 1  | 95300627 | <b>ALG14</b>   |
| rs7540821  | a | 0.1632  | 1.76E-12 | 1  | 95259339 | <b>ALG14</b>   |
| rs12751633 | t | 0.1629  | 1.96E-12 | 1  | 95255256 | <b>ALG14</b>   |
| rs859044   | a | 0.1446  | 3.04E-12 | 1  | 95153618 | <b>CNN3</b>    |
| rs11165305 | a | -0.1362 | 3.90E-12 | 1  | 95344172 | <b>TMEM56</b>  |
| rs859046   | t | 0.1395  | 4.40E-12 | 1  | 95152094 | <b>CNN3</b>    |
| rs2040048  | a | 0.1273  | 4.97E-12 | 1  | 95185002 | <b>CNN3</b>    |
| rs6672436  | t | -0.133  | 5.13E-12 | 1  | 95341850 | <b>TMEM56</b>  |
| rs6665763  | t | -0.1298 | 6.02E-12 | 1  | 95339924 | <b>TMEM56</b>  |
| rs12562716 | a | 0.1329  | 6.75E-12 | 1  | 95343288 | <b>TMEM56</b>  |
| rs4619020  | t | -0.1333 | 6.87E-12 | 1  | 95344382 | <b>TMEM56</b>  |
| rs6666037  | t | 0.2604  | 7.36E-12 | 1  | 95757953 | <b>RWDD3</b>   |
| rs11165281 | t | -0.1678 | 7.73E-12 | 1  | 95202368 | <b>ALG14</b>   |
| rs6672045  | t | 0.1697  | 8.60E-12 | 1  | 95203147 | <b>ALG14</b>   |
| rs3753872  | t | -0.183  | 9.15E-12 | 1  | 95471772 | <b>RWDD3</b>   |
| rs4128898  | c | -0.1326 | 9.43E-12 | 1  | 95346487 | <b>TMEM56</b>  |
| rs11590106 | a | 0.1507  | 9.77E-12 | 1  | 95278423 | <b>ALG14</b>   |
| rs2296308  | t | -0.183  | 9.80E-12 | 1  | 95482527 | <b>RWDD3</b>   |
| rs2147587  | a | 0.183   | 9.83E-12 | 1  | 95487472 | <b>RWDD3</b>   |
| rs7528790  | a | -0.1831 | 1.00E-11 | 1  | 95481662 | <b>RWDD3</b>   |
| rs12092678 | t | 0.1638  | 1.30E-11 | 1  | 95199836 | <b>ALG14</b>   |
| rs4131811  | t | -0.1495 | 1.34E-11 | 1  | 95272737 | <b>ALG14</b>   |
| rs1146460  | t | -0.1236 | 1.83E-11 | 1  | 95181508 | <b>CNN3</b>    |
| rs12755096 | a | 0.1549  | 2.41E-11 | 1  | 95309303 | <b>ALG14</b>   |
| rs1271952  | t | 0.1215  | 3.21E-11 | 1  | 95189936 | <b>CNN3</b>    |
| rs13375406 | c | -0.2113 | 5.86E-11 | 1  | 95378893 | <b>TMEM5</b>   |
| rs2727270  | t | -0.1775 | 7.74E-11 | 11 | 61359813 | <b>6</b>       |
| rs2727271  | a | 0.1768  | 8.97E-11 | 11 | 61359934 | <b>FADS2</b>   |
| rs4950077  | a | -0.1225 | 1.75E-10 | 1  | 95351672 | <b>FADS2</b>   |
| rs174575   | c | 0.1396  | 2.05E-10 | 11 | 61358579 | <b>TMEM56</b>  |
| rs2072114  | a | 0.1672  | 2.58E-10 | 11 | 61361791 | <b>FADS2</b>   |
| rs1023330  | t | 0.1213  | 2.61E-10 | 1  | 95359361 | <b>FADS2</b>   |
| rs2524299  | a | 0.1671  | 4.88E-10 | 11 | 61361358 | <b>TMEM5</b>   |
| rs6697256  | a | -0.1612 | 5.95E-10 | 1  | 95345148 | <b>6</b>       |
| rs6680551  | a | -0.154  | 8.61E-10 | 1  | 95340442 | <b>FADS2</b>   |
| rs11589700 | t | -0.1781 | 1.33E-09 | 1  | 95246029 | <b>TMEM56</b>  |
| rs1132     | a | -0.1162 | 2.23E-09 | 1  | 95166940 | <b>TMEM56</b>  |
| rs684448   | t | -0.1404 | 2.31E-09 | 1  | 95728951 | <b>ALG14</b>   |
| rs11586384 | a | -0.1861 | 2.33E-09 | 1  | 95244329 | <b>CNN3</b>    |
| rs859040   | t | -0.1498 | 2.60E-09 | 1  | 95157258 | <b>RWDD3</b>   |

|            |   |         |          |    |           |               |
|------------|---|---------|----------|----|-----------|---------------|
| rs11119805 | a | -0.1678 | 2.80E-09 | 1  | 209984867 | <b>ALG14</b>  |
| rs174602   | t | 0.2071  | 3.25E-09 | 11 | 61380990  | <b>CNN3</b>   |
| rs1803468  | a | -0.1703 | 3.68E-09 | 1  | 209986708 | LPGAT1        |
| rs174570   | t | -0.1622 | 4.01E-09 | 11 | 61353788  | <b>FADS2</b>  |
| rs11801110 | t | -0.1541 | 4.87E-09 | 1  | 95323242  | <b>LPGAT1</b> |
| rs12739445 | c | -0.1952 | 5.16E-09 | 1  | 95245226  | <b>FADS2</b>  |
| rs12121773 | t | -0.164  | 5.19E-09 | 1  | 210003759 | ALG14         |
| rs10783010 | a | -0.1395 | 5.23E-09 | 1  | 95725239  | <b>ALG14</b>  |
| rs864553   | c | -0.1545 | 5.46E-09 | 1  | 95151013  | <b>LPGAT1</b> |
| rs12751061 | a | 0.1902  | 5.83E-09 | 1  | 95303179  | RWDD3         |
| rs10465759 | t | 0.1488  | 5.85E-09 | 1  | 95263849  | <b>CNN3</b>   |
| rs6684137  | a | -0.1562 | 5.86E-09 | 1  | 95311503  | <b>ALG14</b>  |
| rs174591   | a | -0.1354 | 6.02E-09 | 11 | 61374252  | <b>ALG14</b>  |
| rs1415564  | t | -0.1394 | 6.03E-09 | 1  | 95719822  | ALG14         |
| rs4387224  | t | 0.1526  | 6.30E-09 | 1  | 95319827  | <b>FADS2</b>  |
| rs767015   | t | -0.1105 | 6.41E-09 | 1  | 95169520  | RWDD3         |
| rs12046116 | c | -0.1661 | 7.40E-09 | 1  | 210012164 | ALG14         |
| rs6674467  | a | -0.1562 | 7.45E-09 | 1  | 95303297  | CNN3          |
| rs6678809  | c | 0.153   | 7.66E-09 | 1  | 95315804  | <b>LPGAT1</b> |
| rs3890785  | t | 0.1524  | 7.72E-09 | 1  | 95316595  | <b>ALG14</b>  |
| rs12023263 | t | -0.1646 | 9.87E-09 | 1  | 210010502 | ALG14         |
| rs6667676  | a | -0.1101 | 1.53E-08 | 1  | 95193903  | ALG14         |
| rs11119810 | a | -0.1627 | 1.59E-08 | 1  | 210021748 | <b>LPGAT1</b> |
| rs12126561 | c | 0.1627  | 1.59E-08 | 1  | 210023734 | ALG14         |
| rs1246351  | a | -0.1051 | 1.77E-08 | 1  | 95189329  | <b>LPGAT1</b> |
| rs7543042  | t | 0.1772  | 3.17E-08 | 1  | 95452270  | <b>LPGAT1</b> |
| rs17042024 | t | 0.1689  | 4.73E-08 | 1  | 209980669 | CNN3          |
| rs2845573  | a | 0.1786  | 5.07E-08 | 11 | 61358484  | RWDD3         |
| rs2851682  | a | 0.1718  | 8.14E-08 | 11 | 61372588  | LPGAT1        |
| rs2298095  | t | -0.1612 | 8.29E-08 | 1  | 209983799 | <b>FADS2</b>  |
| rs12566620 | t | 0.1665  | 9.63E-08 | 1  | 209987050 | <b>FADS2</b>  |
| rs6687351  | a | -0.1351 | 1.09E-07 | 1  | 95312293  | LPGAT1        |
| rs422249   | t | -0.1071 | 1.09E-07 | 11 | 61396064  | <b>LPGAT1</b> |
| rs2526678  | a | -0.185  | 1.10E-07 | 11 | 61380369  | ALG14         |
| rs17018028 | t | -0.1726 | 1.19E-07 | 1  | 209997918 | FADS3         |
| rs6662345  | t | -0.1346 | 1.20E-07 | 1  | 95311664  | <b>FADS2</b>  |
| rs6679106  | a | 0.1346  | 1.24E-07 | 1  | 95312366  | <b>LPGAT1</b> |
| rs12129315 | a | 0.164   | 1.24E-07 | 1  | 210052692 | ALG14         |
| rs12565318 | a | 0.1638  | 1.26E-07 | 1  | 210053554 | ALG14         |
| rs12565546 | a | -0.1637 | 1.28E-07 | 1  | 210053802 | <b>LPGAT1</b> |
| rs12145721 | t | -0.1587 | 1.29E-07 | 1  | 210067976 | <b>LPGAT1</b> |
| rs12138283 | a | -0.1652 | 1.30E-07 | 1  | 210045162 | <b>LPGAT1</b> |
| rs11119814 | a | 0.1648  | 1.31E-07 | 1  | 210047786 | <b>LPGAT1</b> |
| rs12125042 | a | 0.1648  | 1.31E-07 | 1  | 210048707 | <b>LPGAT1</b> |

|            |   |         |          |    |           |                |
|------------|---|---------|----------|----|-----------|----------------|
| rs11119816 | a | 0.1597  | 1.37E-07 | 1  | 210066111 | <b>LPGAT1</b>  |
| rs12564498 | t | 0.1641  | 1.39E-07 | 1  | 210044282 | <b>LPGAT1</b>  |
| rs12136792 | t | 0.16    | 1.41E-07 | 1  | 210063940 | <b>LPGAT1</b>  |
| rs12123135 | a | 0.164   | 1.45E-07 | 1  | 210041336 | <b>LPGAT1</b>  |
| rs12562791 | c | 0.1586  | 1.46E-07 | 1  | 210066929 | <b>LPGAT1</b>  |
| rs4132401  | c | 0.1588  | 1.46E-07 | 1  | 210072332 | <b>LPGAT1</b>  |
| rs12123889 | t | -0.1703 | 1.48E-07 | 1  | 210005613 | <b>LPGAT1</b>  |
| rs17018048 | a | -0.1704 | 1.48E-07 | 1  | 210008607 | LPGAT1         |
| rs1065607  | t | 0.1639  | 1.51E-07 | 1  | 210039398 | <b>LPGAT1</b>  |
| rs1887094  | c | 0.0981  | 1.72E-07 | 1  | 95191290  | <b>LPGAT1</b>  |
| rs4615892  | t | -0.1249 | 1.77E-07 | 1  | 95319811  | <b>LPGAT1</b>  |
| rs1265168  | t | 0.1333  | 1.90E-07 | 1  | 95167419  | CNN3           |
| rs7417186  | t | -0.1243 | 1.92E-07 | 1  | 95319018  | ALG14          |
| rs1414904  | t | -0.1035 | 3.15E-07 | 1  | 95406565  | CNN3           |
| rs174449   | a | 0.0969  | 3.32E-07 | 11 | 61396955  | ALG14          |
| rs742614   | a | -0.095  | 3.37E-07 | 20 | 31946293  | <b>TMEM5</b>   |
| rs174448   | a | 0.0971  | 3.53E-07 | 11 | 61396149  | <b>6</b>       |
| rs6593594  | t | -0.1024 | 3.65E-07 | 1  | 95403352  | FADS3          |
| rs11165334 | a | 0.1011  | 4.00E-07 | 1  | 95411255  | CHMP4B         |
| rs12123355 | a | 0.1635  | 4.20E-07 | 1  | 210119158 | FADS3          |
| rs11165336 | t | 0.1009  | 4.80E-07 | 1  | 95426938  | <b>TMEM5</b>   |
| rs11165338 | t | 0.1006  | 5.34E-07 | 1  | 95431358  | <b>6</b>       |
| rs12239887 | a | -0.1176 | 7.08E-07 | 1  | 95313071  | <b>TMEM5</b>   |
| rs4364936  | t | 0.1486  | 8.16E-07 | 1  | 210077150 | <b>6</b>       |
| rs10874924 | t | -0.0941 | 9.18E-07 | 1  | 95738749  | LPGAT1         |
| rs174579   | t | -0.1152 | 1.23E-06 | 11 | 61362189  | <b>TMEM5</b>   |
| rs736264   | t | -0.0886 | 1.26E-06 | 20 | 31946047  | <b>6</b>       |
| rs11590093 | a | -0.1385 | 1.36E-06 | 1  | 95194032  | <b>TMEM5</b>   |
| rs11120822 | c | 0.0931  | 1.44E-06 | 1  | 7035699   | <b>6</b>       |
| rs4436414  | a | 0.0903  | 1.85E-06 | 1  | 7043502   | ALG14          |
| rs11807661 | a | 0.1254  | 1.86E-06 | 1  | 95173787  | LPGAT1         |
| rs7414485  | a | 0.0901  | 1.89E-06 | 1  | 7043984   | RWDD3          |
| rs174532   | a | 0.1142  | 2.11E-06 | 11 | 61305450  | <b>FADS2</b>   |
| rs6057930  | t | 0.086   | 2.15E-06 | 20 | 31941633  | CHMP4B         |
| rs6057929  | a | -0.0857 | 2.38E-06 | 20 | 31941294  | ALG14          |
| rs6057924  | t | -0.0852 | 3.52E-06 | 20 | 31938232  | <b>CAMTA</b>   |
| rs4555772  | a | 0.0888  | 3.93E-06 | 5  | 74338414  | <b>1</b>       |
| rs12098564 | a | -0.435  | 4.07E-06 | 10 | 86943307  | <b>CAMTA</b>   |
| rs412334   | t | 0.1413  | 4.08E-06 | 11 | 61316837  | <b>1</b>       |
| rs16949516 | t | -0.2015 | 4.12E-06 | 15 | 93119771  | CNN3           |
| rs12440212 | a | -0.2101 | 4.15E-06 | 15 | 93114762  | <b>CAMTA</b>   |
| rs174585   | a | -0.114  | 4.36E-06 | 11 | 61368270  | <b>1</b>       |
| rs12442726 | t | -0.2105 | 4.37E-06 | 15 | 93114079  | <b>C11orf9</b> |
| rs16949491 | a | 0.2101  | 4.38E-06 | 15 | 93114610  | CHMP4B         |

|            |   |        |          |   |           |                                                                                                                      |
|------------|---|--------|----------|---|-----------|----------------------------------------------------------------------------------------------------------------------|
| rs12134748 | a | 0.0868 | 4.45E-06 | 1 | 95754414  | CHMP4B                                                                                                               |
| rs7550711  | t | 0.2743 | 4.94E-06 | 1 | 109884409 | CHMP4B<br>GCNT4<br>GRID1<br><b>FEN1</b><br>MCTP2<br>MCTP2<br><b>FADS2</b><br>MCTP2<br>MCTP2<br>RWDD3<br><b>GPR61</b> |

### 5. Comprehensive results for oleic acid (18:1n-9) with $P < 5 \times 10^{-6}$

| Marker Name | Effect allele | Effect* | P-value  | Chr | Position | Nearest Gene**  |
|-------------|---------------|---------|----------|-----|----------|-----------------|
| rs102275    | t             | -0.23   | 2.19E-32 | 11  | 61314379 | <b>C11orf10</b> |
| rs174546    | t             | 0.2286  | 3.78E-32 | 11  | 61326406 | <b>FADS1</b>    |
| rs174535    | t             | -0.2292 | 5.16E-32 | 11  | 61307932 | <b>C11orf9</b>  |
| rs174536    | a             | -0.2291 | 5.37E-32 | 11  | 61308503 | <b>C11orf9</b>  |
| rs174547    | t             | -0.2282 | 5.57E-32 | 11  | 61327359 | <b>FADS1</b>    |
| rs174545    | c             | -0.2277 | 7.67E-32 | 11  | 61325882 | <b>FADS1</b>    |
| rs174574    | a             | 0.2299  | 8.76E-32 | 11  | 61356918 | <b>FADS2</b>    |
| rs174537    | t             | 0.2285  | 8.89E-32 | 11  | 61309256 | <b>C11orf9</b>  |
| rs174550    | t             | -0.2272 | 9.84E-32 | 11  | 61328054 | <b>FADS1</b>    |
| rs174548    | c             | -0.2381 | 1.39E-31 | 11  | 61327924 | <b>FADS1</b>    |
| rs174577    | a             | 0.2313  | 1.46E-31 | 11  | 61361390 | <b>FADS2</b>    |
| rs174576    | a             | 0.2307  | 2.81E-31 | 11  | 61360086 | <b>FADS2</b>    |
| rs174549    | a             | 0.2373  | 4.31E-31 | 11  | 61327958 | <b>FADS1</b>    |
| rs174578    | a             | 0.2302  | 5.42E-31 | 11  | 61362075 | <b>FADS2</b>    |
| rs1535      | a             | -0.2243 | 5.63E-31 | 11  | 61354548 | <b>FADS2</b>    |
| rs174555    | t             | -0.2349 | 9.22E-31 | 11  | 61336336 | <b>FADS1</b>    |
| rs174556    | t             | 0.2306  | 3.73E-30 | 11  | 61337211 | <b>FADS1</b>    |
| rs174541    | t             | -0.2253 | 3.97E-30 | 11  | 61322484 | FADS1           |
| rs4246215   | t             | 0.2236  | 1.14E-29 | 11  | 61320875 | <b>FEN1</b>     |
| rs174583    | t             | 0.2238  | 1.22E-29 | 11  | 61366326 | <b>FADS2</b>    |
| rs174528    | t             | -0.2195 | 3.40E-29 | 11  | 61300075 | <b>C11orf9</b>  |
| rs174538    | a             | 0.2261  | 1.91E-28 | 11  | 61316657 | <b>C11orf10</b> |
| rs174601    | t             | 0.2334  | 1.91E-27 | 11  | 61379716 | <b>FADS2</b>    |
| rs108499    | t             | 0.2121  | 2.53E-25 | 11  | 61303813 | <b>C11orf9</b>  |
| rs174534    | a             | -0.2108 | 2.63E-25 | 11  | 61306034 | <b>C11orf9</b>  |
| rs174570    | t             | 0.2275  | 2.81E-18 | 11  | 61353788 | <b>FADS2</b>    |
| rs2845573   | a             | -0.2858 | 5.47E-18 | 11  | 61358484 | <b>FADS2</b>    |

|            |   |         |          |    |           |                |
|------------|---|---------|----------|----|-----------|----------------|
| rs2851682  | a | -0.276  | 2.70E-17 | 11 | 61372588  | <b>FADS2</b>   |
| rs2727270  | t | 0.24    | 6.08E-17 | 11 | 61359813  | <b>FADS2</b>   |
| rs2727271  | a | -0.2393 | 7.08E-17 | 11 | 61359934  | <b>FADS2</b>   |
| rs2526678  | a | 0.2892  | 7.73E-17 | 11 | 61380369  | <b>FADS2</b>   |
| rs2524299  | a | -0.2294 | 4.59E-16 | 11 | 61361358  | <b>FADS2</b>   |
| rs2072114  | a | -0.2212 | 1.80E-15 | 11 | 61361791  | <b>FADS2</b>   |
| rs174575   | c | -0.1632 | 5.56E-14 | 11 | 61358579  | <b>FADS2</b>   |
| rs174448   | a | -0.1399 | 3.03E-13 | 11 | 61396149  | FADS3          |
| rs174449   | a | -0.1388 | 4.27E-13 | 11 | 61396955  | FADS3          |
| rs422249   | t | 0.1441  | 1.27E-12 | 11 | 61396064  | FADS3          |
| rs174455   | a | -0.1357 | 1.97E-12 | 11 | 61412693  | <b>FADS3</b>   |
| rs174450   | t | -0.1275 | 9.98E-12 | 11 | 61398118  | <b>FADS3</b>   |
| rs174616   | a | 0.126   | 1.19E-11 | 11 | 61385698  | <b>FADS2</b>   |
| rs174579   | t | 0.1535  | 3.52E-11 | 11 | 61362189  | <b>FADS2</b>   |
| rs174591   | a | 0.1503  | 4.87E-11 | 11 | 61374252  | <b>FADS2</b>   |
| rs174626   | a | -0.1216 | 7.07E-11 | 11 | 61393633  | FADS2          |
| rs509360   | a | -0.1498 | 7.15E-11 | 11 | 61305135  | <b>C11orf9</b> |
| rs174611   | t | -0.1311 | 2.00E-10 | 11 | 61384457  | <b>FADS2</b>   |
| rs174605   | t | 0.1308  | 4.30E-10 | 11 | 61383497  | <b>FADS2</b>   |
| rs174585   | a | 0.1492  | 6.62E-10 | 11 | 61368270  | <b>FADS2</b>   |
| rs174589   | c | -0.1464 | 8.22E-10 | 11 | 61372379  | <b>FADS2</b>   |
| rs174532   | a | -0.1537 | 2.96E-09 | 11 | 61305450  | <b>C11orf9</b> |
| rs7394871  | a | 0.3445  | 4.52E-09 | 11 | 61409090  | <b>FADS3</b>   |
| rs174602   | t | -0.2031 | 5.15E-09 | 11 | 61380990  | <b>FADS2</b>   |
| rs174597   | c | 0.1541  | 8.57E-09 | 11 | 61377616  | <b>FADS2</b>   |
| rs174593   | t | -0.1535 | 8.64E-09 | 11 | 61375407  | <b>FADS2</b>   |
| rs968567   | t | 0.1424  | 1.19E-08 | 11 | 61352140  | FADS2          |
| rs17764935 | a | 0.3051  | 2.55E-08 | 11 | 61421333  | RAB3IL1        |
| rs174468   | a | -0.1212 | 2.79E-08 | 11 | 61420267  | RAB3IL1        |
| rs174478   | t | 0.1172  | 5.30E-08 | 11 | 61435152  | <b>RAB3IL1</b> |
| rs174476   | t | -0.1168 | 6.26E-08 | 11 | 61430694  | <b>RAB3IL1</b> |
| rs666870   | a | -0.1168 | 6.32E-08 | 11 | 61434055  | <b>RAB3IL1</b> |
| rs12529874 | a | -0.4799 | 2.62E-07 | 6  | 98569222  | C6orf167       |
| rs149803   | c | 0.1489  | 4.14E-07 | 11 | 61295596  | <b>C11orf9</b> |
| rs412334   | t | -0.1641 | 1.11E-06 | 11 | 61316837  | <b>FEN1</b>    |
| rs17648246 | a | -0.275  | 1.12E-06 | 13 | 44391881  | NUFIP1         |
| rs3134950  | a | -0.0945 | 1.14E-06 | 6  | 32235455  | <b>PPT2</b>    |
| rs334809   | a | 0.3286  | 1.31E-06 | 3  | 3105221   | <b>IL5RA</b>   |
| rs1061808  | t | 0.0936  | 1.38E-06 | 6  | 32244525  | <b>EGFL8</b>   |
| rs17762402 | a | -0.3286 | 1.45E-06 | 11 | 61309777  | <b>C11orf9</b> |
| rs2269423  | a | 0.0928  | 1.45E-06 | 6  | 32253685  | <b>AGPAT1</b>  |
| rs12280105 | a | -0.7135 | 2.59E-06 | 11 | 123257038 | PMP22CD        |
| rs2269928  | t | -0.1374 | 3.68E-06 | 11 | 61294105  | <b>C11orf9</b> |
| rs4731889  | a | -0.0856 | 4.59E-06 | 7  | 131975849 | <b>PLXNA4</b>  |

|            |   |        |          |    |           |               |
|------------|---|--------|----------|----|-----------|---------------|
| rs6948781  | t | 0.0855 | 4.61E-06 | 7  | 131976136 | <b>PLXNA4</b> |
| rs17774576 | c | 0.3891 | 4.83E-06 | 10 | 50170465  | C10orf71      |
| rs11006464 | t | 0.3832 | 4.84E-06 | 10 | 60816588  | FAM13C1       |

\*Regression coefficient associated with one copy of the effect allele

\*Nearest reference is bolded if SNP is within the reference gene

## 6. Imputation quality of genome-wide significant SNPs

| SNP        | Imputation quality |          |           |          |        |
|------------|--------------------|----------|-----------|----------|--------|
|            | ARIC               | CHS      | InCHIANTI | MESA     | CARDIA |
| rs2391388  | 0.9999             | 0.878168 | 0.9788    | 1        | 1      |
| rs6675668  | 0.9965             | 0.78999  | 0.9619    | 1        | 0.995  |
| rs11119805 | 0.9847             | 0.869145 | 0.9448    | 0.959184 | 0.995  |
| rs102275   | 0.9802             | 1        | 0.9995    | 0.995995 | 0.981  |
| rs603424   | 0.9884             | 1        | 0.8659    | 1        | 0.441  |
| rs11190604 | 1                  | 0.863035 | 0.9968    | 1        | 1      |
| rs780093   | 0.9987             | 0.996663 | 0.998     | 0.992724 | 0.999  |
| rs6722456  | 0.9984             | 0.632244 | 0.9993    | 0.977739 | 0.972  |

\*Imputation quality was calculated as the ratio of the observed variance of the allele dosage to the expected binomial variance  $p(1-p)$  at Hardy–Weinberg equilibrium, where  $p$  is the observed allele frequency from HapMap. Values close to 1 indicate excellent imputation quality

## Supplemental References

1. The Atherosclerosis Risk in Communities (ARIC) Study: design and objectives. The ARIC investigators. *Am J Epidemiol.* 1989;129:687-702.
2. Purcell S, Neale B, Todd-Brown K, Thomas L, Ferreira MA, Bender D, et al. PLINK: a tool set for whole-genome association and population-based linkage analyses. *Am J Hum Genet.* 2007;81:559-575.
3. Price AL, Patterson NJ, Plenge RM, Weinblatt ME, Shadick NA, Reich D. Principal components analysis corrects for stratification in genome-wide association studies. *Nat Genet.* 2006;38:904-909.
4. Cao J, Schwichtenberg KA, Hanson NQ, Tsai MY. Incorporation and clearance of omega-3 fatty acids in erythrocyte membranes and plasma phospholipids. *Clin Chem.* 2006;52:2265-2272.
5. Fried LP, Borhani NO, Enright P, Furberg CD, Gardin JM, Kronmal RA, et al. The Cardiovascular Health Study: design and rationale. *Ann Epidemiol.* 1991;1:263-276.
6. Friedman GD, Cutter GR, Donahue RP, Hughes GH, Hulley SB, Jacobs DR, Jr., et al. CARDIA: study design, recruitment, and some characteristics of the examined subjects. *J Clin Epidemiol.* 1988;41:1105-1116.
7. Lemaitre RN, Tanaka T, Tang W, Manichaikul A, Foy M, Kabagambe EK, et al. Genetic loci associated with plasma phospholipid n-3 fatty acids: a meta-analysis of genome-wide association studies from the CHARGE Consortium. *PLoS Genet.* 2011;7:e1002193.
8. Ferrucci L, Cherubini A, Bandinelli S, Bartali B, Corsi A, Lauretani F, et al. Relationship of plasma polyunsaturated fatty acids to circulating inflammatory markers. *J Clin Endocrinol Metab.* 2006;91:439-446.
9. Lepage G, Roy CC. Direct transesterification of all lipids in a one-step reaction. *J Lipid Res.* 1986;27:114-120.
10. Rodriguez-Palmero M, Lopez-Sabater MC, Castellote-Bargallo AI, De la Torre-Boronat MC, Rivero-Urgell M. Comparison of two methods for the determination of fatty acid profiles in plasma and erythrocytes. *J Chromatogr A.* 1998;793:435-440.
11. Bild DE, Bluemke DA, Burke GL, Detrano R, Diez Roux AV, Folsom AR, et al. Multi-ethnic study of atherosclerosis: objectives and design. *Am J Epidemiol.* 2002;156:871-881.
